# Supplementary material
Source: Springer Nature journal article supplement (https://www.springermedizin.de/resource/supplementary/12904_2014_189_MOESM5_ESM.pdf/9517820)
Supplement: MOESM5 [file 9517820]

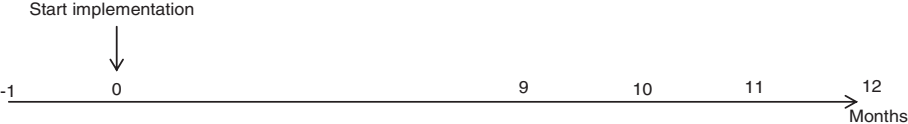

|                                  |                                               |                                   |  |                       |
|----------------------------------|-----------------------------------------------|-----------------------------------|--|-----------------------|
| Pre-test<br>effect<br>evaluation | Trajectory: Implementation of 'best practice' | Post-test<br>effect<br>evaluation |  | Process<br>evaluation |
|----------------------------------|-----------------------------------------------|-----------------------------------|--|-----------------------|
